# Supplementary material for: Identification of Dactylopius cochineal species with high-performance liquid chromatography and multivariate data analysis
Source: Royal Society of Chemistry journal article supplement (doi:10.1039/c3an00052d), 2013-01-01
Supplement: c3an00052d.pdf [file c3an00052d.pdf]

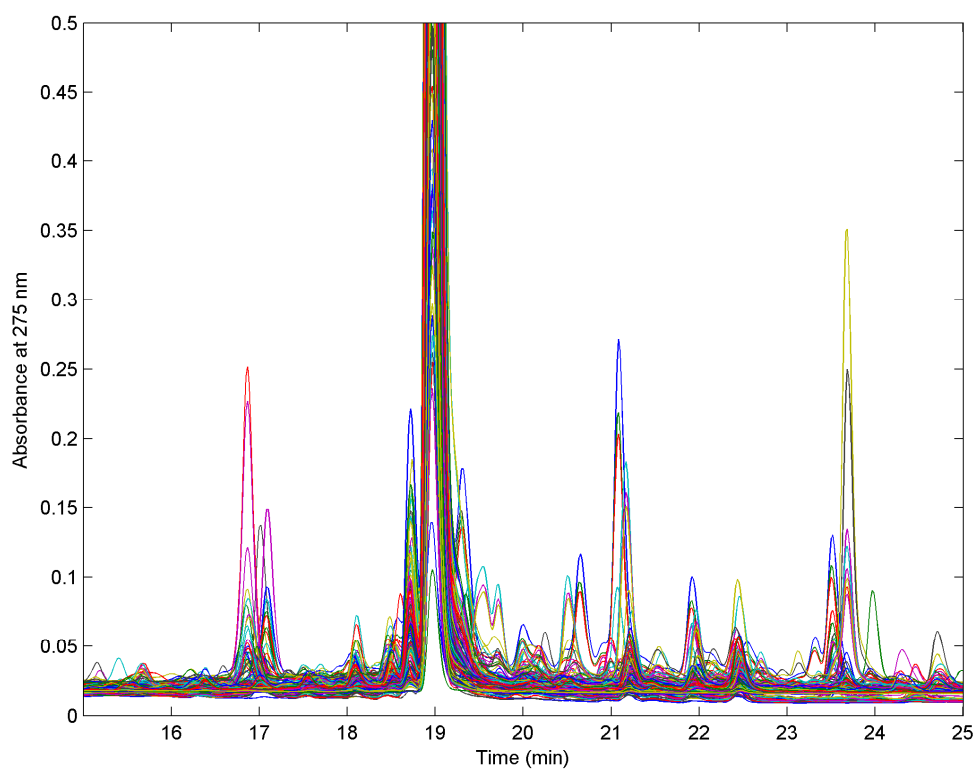

Fig. S1. Raw HPLC-DAD chromatograms for the 72 *Dactylopius* cochineal samples of the reference database (note that these are raw chromatograms therefore baseline was not removed and peaks were not aligned).
